# Supplementary material
Source: publisher site journal article supplement (https://www.dovepress.com/article/supplementary_file/570839/Table%20S1%20Search%20strategy%20dyad_leadership_03092025.docx)
Supplement: Supplementary file 1 [file Table%20S1%20Search%20strategy%20dyad_leadership_03092025.docx]

**Table 1: Search strategies for eight databases - PubMed, Google Scholar, CINAHL, Web of Science, ERIC, Medline (EBSCO), Scopus, and PsychInfo.”**

1. **PubMed: 81**

Search: ((Dyad AND (english[Filter])) AND ((Leadership) OR (Leaders) AND (english[Filter])) AND (english[Filter])) AND (((Medical education) OR (Healthcare))) Filters: English, from 2000 – 2025

MESH: ("Dyad"[All Fields] AND "english"[Language] AND (("leadership"[MeSH Terms] OR "leadership"[All Fields] OR "leadership s"[All Fields] OR "leaderships"[All Fields] OR ("leader"[All Fields] OR "leader s"[All Fields] OR "leaders"[All Fields])) AND "english"[Language]) AND "english"[Language] AND ("education, medical"[MeSH Terms] OR ("education"[All Fields] AND "medical"[All Fields]) OR "medical education"[All Fields] OR ("medical"[All Fields] AND "education"[All Fields]) OR ("delivery of health care"[MeSH Terms] OR ("delivery"[All Fields] AND "health"[All Fields] AND "care"[All Fields]) OR "delivery of health care"[All Fields] OR "healthcare"[All Fields] OR "healthcare s"[All Fields] OR "healthcares"[All Fields]))) AND ((english[Filter]) AND (2000:2025[pdat]))

Translations

english[Filter]: english [LA]

Leadership: "leadership"[MeSH Terms] OR "leadership"[All Fields] OR "leadership's"[All Fields] OR "leaderships"[All Fields]

Leaders: "leader"[All Fields] OR "leader's"[All Fields] OR "leaders"[All Fields]

english[Filter]: english [LA]

english[Filter]: english [LA]

Medical education: "education, medical"[MeSH Terms] OR ("education"[All Fields] AND "medical"[All Fields]) OR "medical education"[All Fields] OR ("medical"[All Fields] AND "education"[All Fields])

Healthcare: "delivery of health care"[MeSH Terms] OR ("delivery"[All Fields] AND "health"[All Fields] AND "care"[All Fields]) OR "delivery of health care"[All Fields] OR "healthcare"[All Fields] OR "healthcare's"[All Fields] OR "healthcares"[All Fields]

**Search strategies:**

| 4 | ((dyad leadership) OR (dyad leaders) AND (english[Filter])) AND ((Medical education) OR (Healthcare) AND (english[Filter])) | English, from 2000 - 2025 | 81 |
| --- | --- | --- | --- |
| 3 | ((dyad leadership) OR (dyad leaders) AND (english[Filter])) AND ((Medical education) OR (Healthcare) AND (english[Filter])) | English | 83 |
| 2 | (Medical education) OR (Healthcare) | English | 2,551,871 |
| 1 | (dyad leadership) OR (dyad leaders) | English | 222 |

1. **Google Scholar: 22**

Search: "Dyad leadership"|"Dyad Leaders" "Healthcare"|"Medical education"

Timeline: 2000-2025

Article type: Review article

**Search strategies:**

| 4 | "Dyad leadership"|"Dyad Leaders" "Healthcare"|"Medical education" | 2000-2025  Review | 22 |
| --- | --- | --- | --- |
| 3 | "Dyad leadership"|"Dyad Leaders" "Healthcare"|"Medical education" | 2000-2025 | 276 |
| 2 | "Healthcare"|"Medical education" | 2000-2025 | 426,000 |
| 1 | "dyad leadership"|"dyad leaders" | 2000-2025 | 393 |

1. **CINAHL: 22**

Search: (dyad leadership OR dyad leaders)AND(medical education OR healthcare)

Timeline: 2000-2025

**Search strategies:**

| S5 | S1 AND S2 | Limiters - Publication Date: 20000101-20251231 Expanders - Apply equivalent subjects Narrow by Language: - english Search modes - Boolean or Phrase | Interface - EBSCOhost Research Databases Search Screen - Advanced Search Database - CINAHL Plus with Full Text | 22 |
| --- | --- | --- | --- | --- |
| S4 | S1 AND S2 | Limiters - Publication Date: 20000101-20251231 Expanders - Apply equivalent subjects Search modes - Boolean or Phrase | Interface - EBSCOhost Research Databases Search Screen - Advanced Search Database - CINAHL Plus with Full Text | 22 |
| S3 | S1 AND S2 | Expanders - Apply equivalent subjects Search modes - Boolean or Phrase | Interface - EBSCOhost Research Databases Search Screen - Advanced Search Database - CINAHL Plus with Full Text | 22 |
| S2 | medical education OR healthcare | Expanders - Apply equivalent subjects Search modes - Boolean or Phrase | Interface - EBSCOhost Research Databases Search Screen - Advanced Search Database - CINAHL Plus with Full Text | 885,616 |
| S1 | dyad leadership OR dyad leaders | Expanders - Apply equivalent subjects Search modes - Boolean or Phrase | Interface - EBSCOhost Research Databases Search Screen - Advanced Search Database - CINAHL Plus with Full Text | 72 |

1. **Web of science: 169**

Search:

Timeline: 2000-2025

**Search strategies:**

| 3 | #1 & #2 | 169 |
| --- | --- | --- |
| 2 | Medical education (All Fields) OR healthcare (All Fields) Timespan: 2000-01-01 to 2025-09-01 | 2589301 |
| 1 | Dyad leadership (All Fields) OR Dyad leaders (All Fields) Timespan: 2000-01-01 to 2025-09-01 | 2,260 |
|  |  |  |

1. **ERIC: 0**

**Search strategies:**

| #1 | (kw: dyad and kw: leadership) or ((kw: dyad and kw: leaders)) and yr: 2000-2025 | 18 |
| --- | --- | --- |
| #2 | kw: Medical and kw: education) or kw: healthcare and yr: 2000-2025 | 16197 |
| #3 | ((kw: dyad and kw: leadership) or ((kw: dyad and kw: leaders)) and yr: 2000-2025) and ((kw: Medical and kw: education) or kw: healthcare and yr: 2000-2025) | 0 |

1. **Medline (EBSCO): 7**

**Search strategies:**

| 5 | 4 and 2 | 7 |
| --- | --- | --- |
| 4 | limit 3 to yr="2000 - 2025" | 535814 |
| 3 | (medical education or healthcare).mp. [mp=title, book title, abstract, original title, name of substance word, subject heading word, floating sub-heading word, keyword heading word, organism supplementary concept word, protocol supplementary concept word, rare disease supplementary concept word, unique identifier, synonyms, population supplementary concept word, anatomy supplementary concept word] | 566041 |
| 2 | limit 1 to yr="2000 - 2025" | 11 |
| 1 | (dyad leadership or dyad leaders).mp. [mp=title, book title, abstract, original title, name of substance word, subject heading word, floating sub-heading word, keyword heading word, organism supplementary concept word, protocol supplementary concept word, rare disease supplementary concept word, unique identifier, synonyms, population supplementary concept word, anatomy supplementary concept word] | 11 |

1. **Scopus: 69**

Search:

((TITLE-ABS-KEY ((Dyad leadership) OR (Dyad Leaders)))AND(TITLE-ABS-KEY ((Medical education) OR (Healthcare))))

Timeline: 2000-2025

**Search strategies:**

| #3 | ((TITLE-ABS-KEY ((Dyad leadership) OR (Dyad Leaders)))AND(TITLE-ABS-KEY ((Medical education) OR (Healthcare)))) | 69 |
| --- | --- | --- |
| #2 | (TITLE-ABS-KEY ((Medical education) OR (Healthcare))) | 7498 |
| #1 | (TITLE-ABS-KEY ((Dyad leadership) OR (Dyad Leaders))) | 121 |

1. **PsychInfo: 2**

**Search strategies:**

| #1 | (Dyad leadership or Dyad Leaders).mp. [mp=title, abstract, heading word, table of contents, key concepts, original title, tests & measures, mesh word] | 6 |
| --- | --- | --- |
| #2 | (Medical education or healthcare).mp. [mp=title, abstract, heading word, table of contents, key concepts, original title, tests & measures, mesh word] | 109410 |
| #3 | 1 and 2 | 2 |
